# Supplementary material
Source: PubMed Central journal article supplement (PMC8129731)
Supplement: mmc1.pdf [file mmc1.pdf]

## Novel Machine Learning Can Predict Acute Asthma Exacerbation

*Joe G. Zein, MD, PhD; Chao-Ping Wu, MD; Amy H. Attaway, MD; Peng Zhang, MD; and Aziz Nazha, MD*

CHEST 2021; 159(5):1747-1757

*Online supplements are not copyedited prior to posting and the author(s) take full responsibility for the accuracy of all data.*

© 2021 AMERICAN COLLEGE OF CHEST PHYSICIANS. Reproduction of this article is prohibited without written permission from the American College of Chest Physicians. See online for more details. DOI: 10.1016/j.chest.2020.12.051

**e-Figure 1:** Flow chart of patient in final analysis.

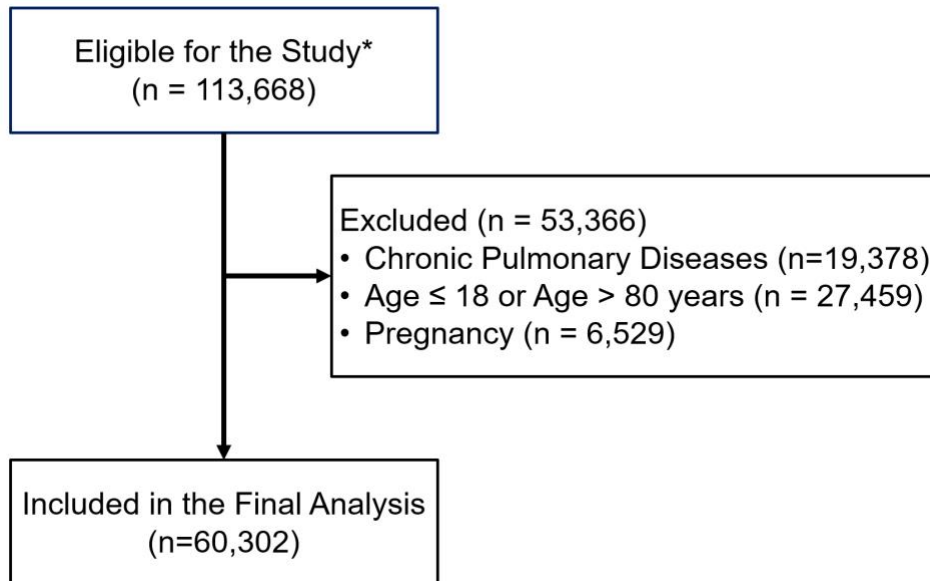

\*To be considered eligible, patients should carry the ICD10-CM of J45\* or ICD9-CM of 493\* and be treated with asthma medications for 6 or more months. They also should be non-smokers or ex-smokers with 10 pack-year smoking history or less.

**e-Figure 2-4: Relative risk of different outcome with independent variables in different prediction models.** S1: Non-severe exacerbation prediction model, S2: ED visits prediction model and S3: hospitalization prediction model. The x-axis indicated the value of the covariable, the y-axis indicated the relative risk of exacerbation

**e-Figure 2: relative risk of non-severe exacerbation with independent variables**

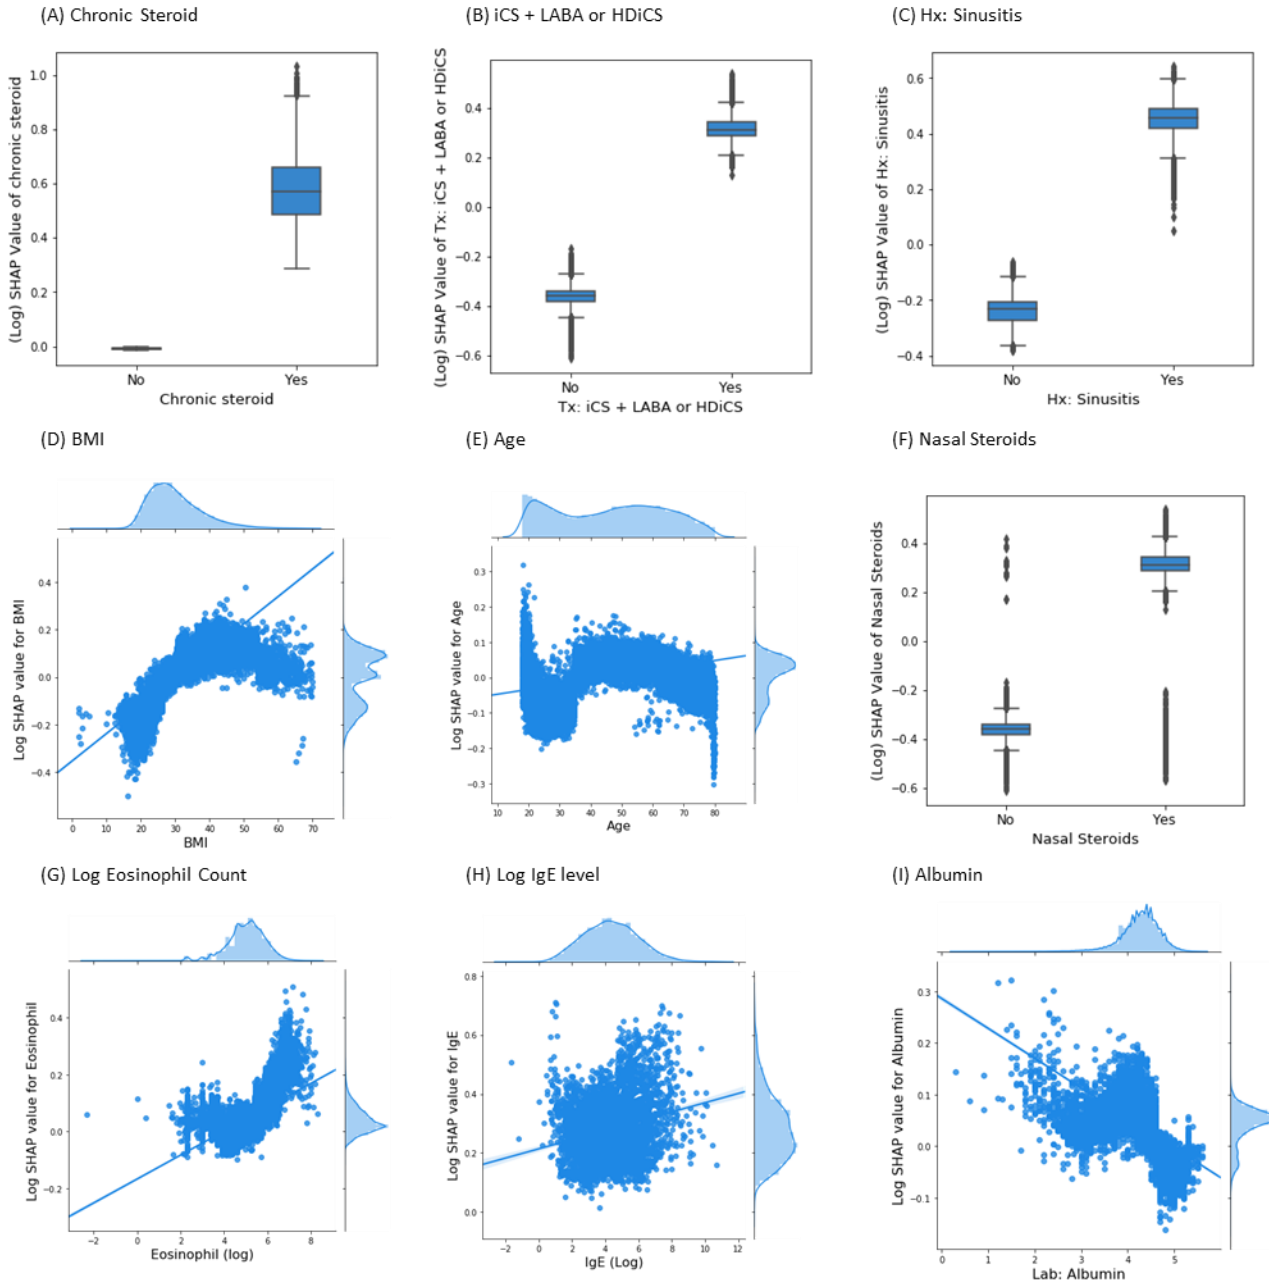

**e-Figure 3:** Relative risk of ED visits with independent variables

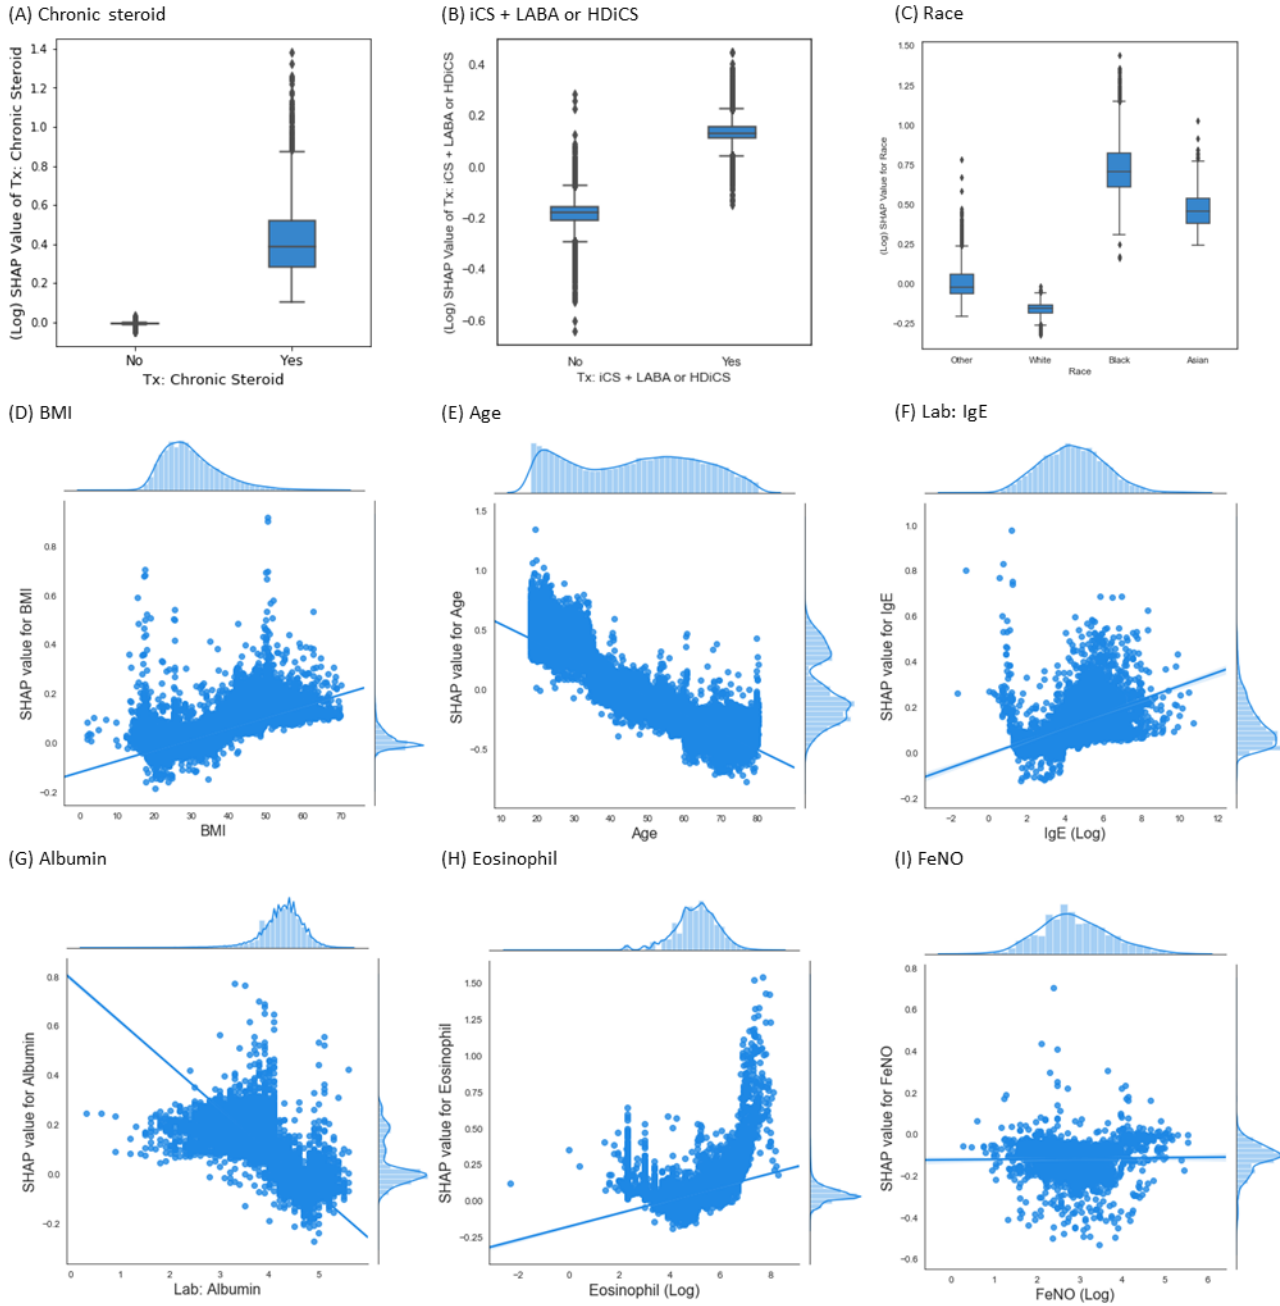

**e-Figure 4: Relative risk of hospitalization with independent variables**

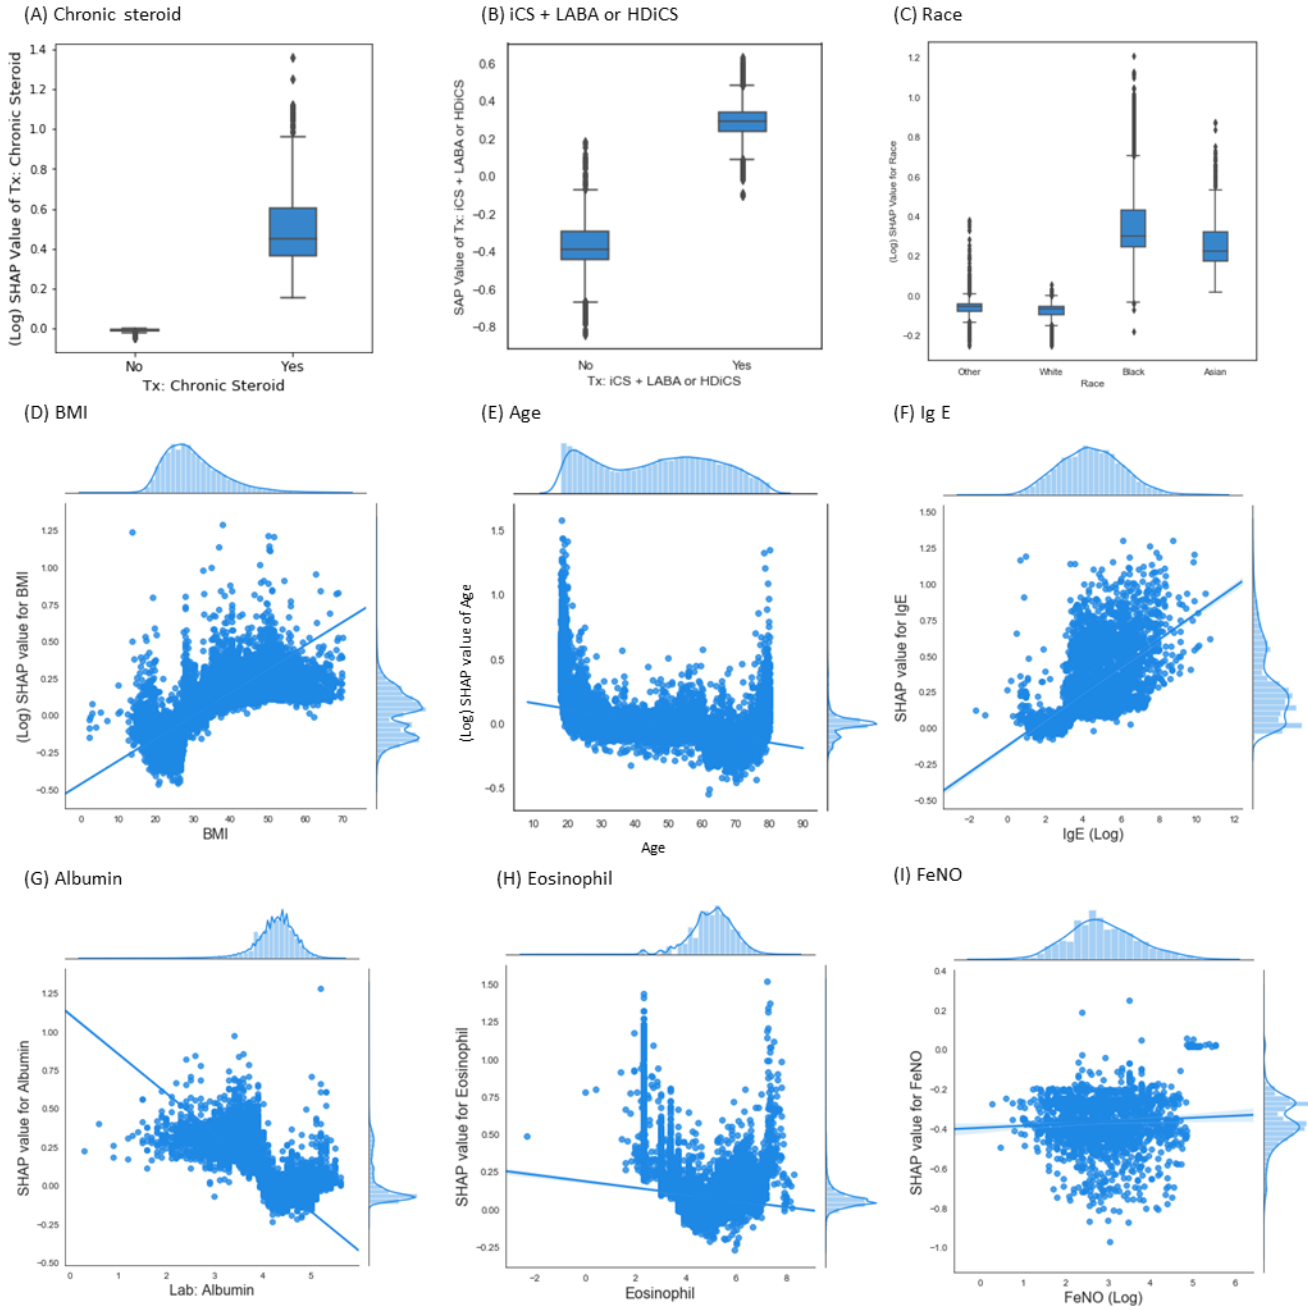

**e-Figure 5: Relative risk of ED visit with independent variables in patients with PFT data:** (A) SHAP summary plot for ED visit prediction model in patients with PFTs ranking from the covariable with highest impact. Oral Glucocorticoids burst frequency had the highest impact among all the covariables. The plot was colored according to the value of covariables with pink color indicated higher value and blue color indicated lower value. FEV1, FVC and FEV1/FVC were all in top 20 features. (B-D) Independent distribution plots demonstrated the relationship between PFT and relative risk of ED visits.

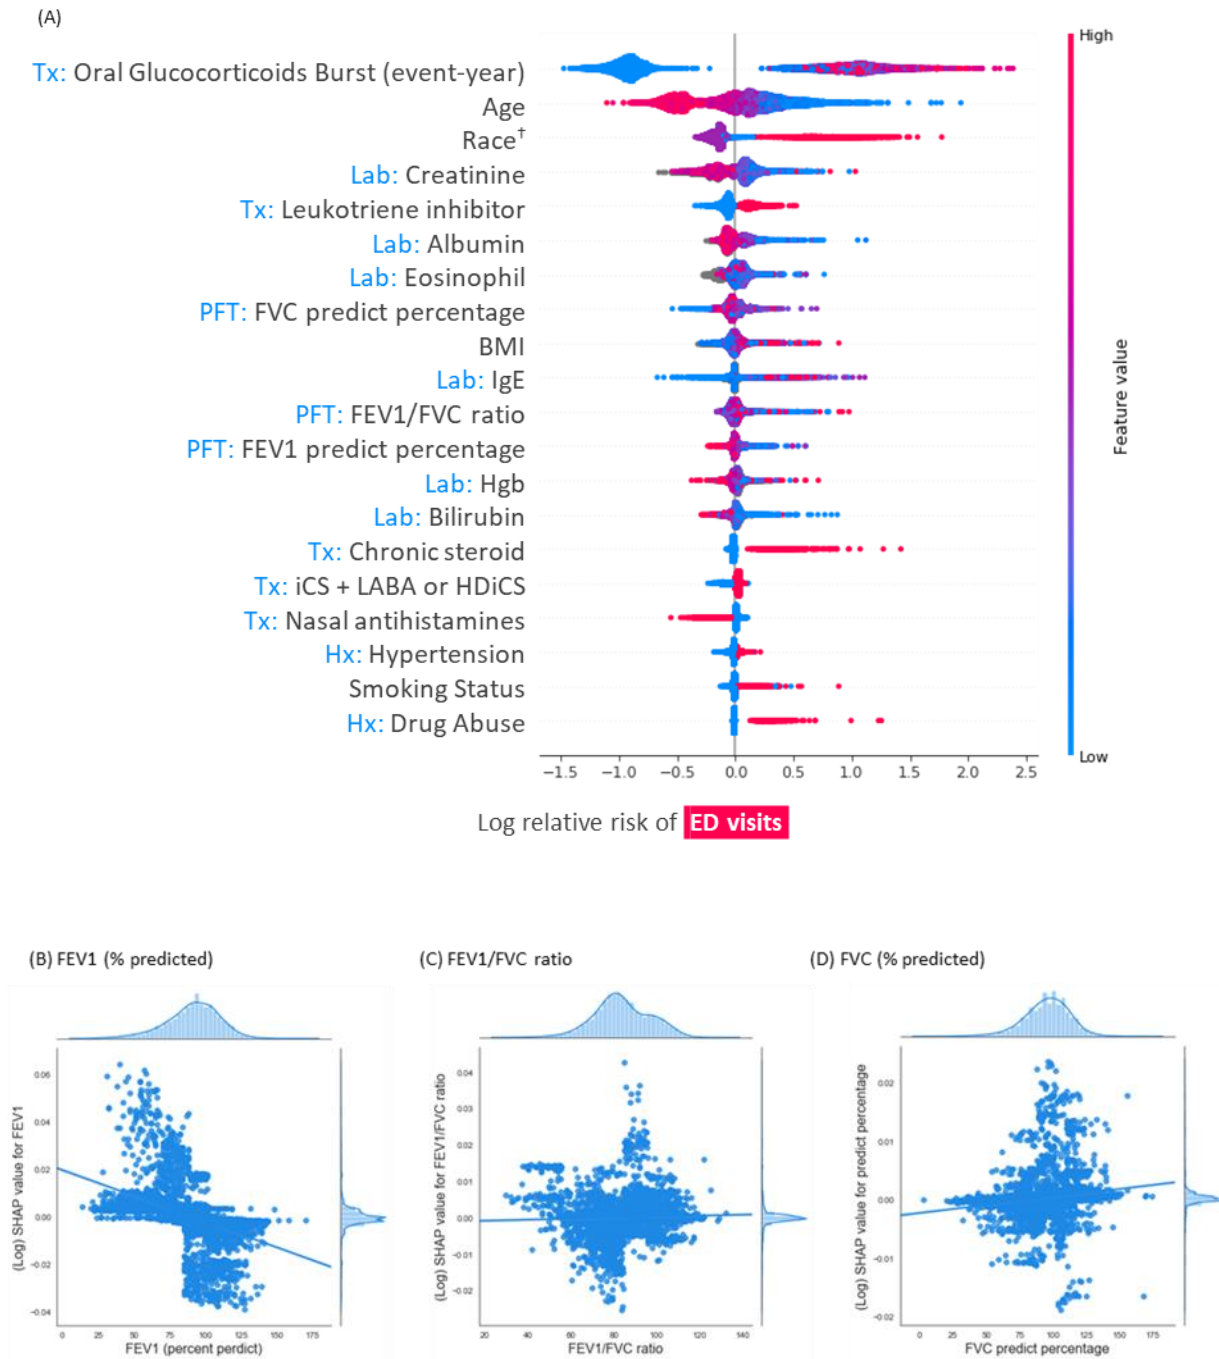

**e-Figure 6: Relative risk of hospitalization with independent variables in patients with PFT data:** (A) SHAP summary plot for hospitalization prediction model ranking from the covariable with highest impact. FEV1 had the 5<sup>th</sup> highest impact among all the covariables, and FEV1, FVC and FEV1/FVC ratios were all amongst the top impact ones. (B-D) Independent distribution plots demonstrated the relationship between PFT and relative risk of hospitalization.

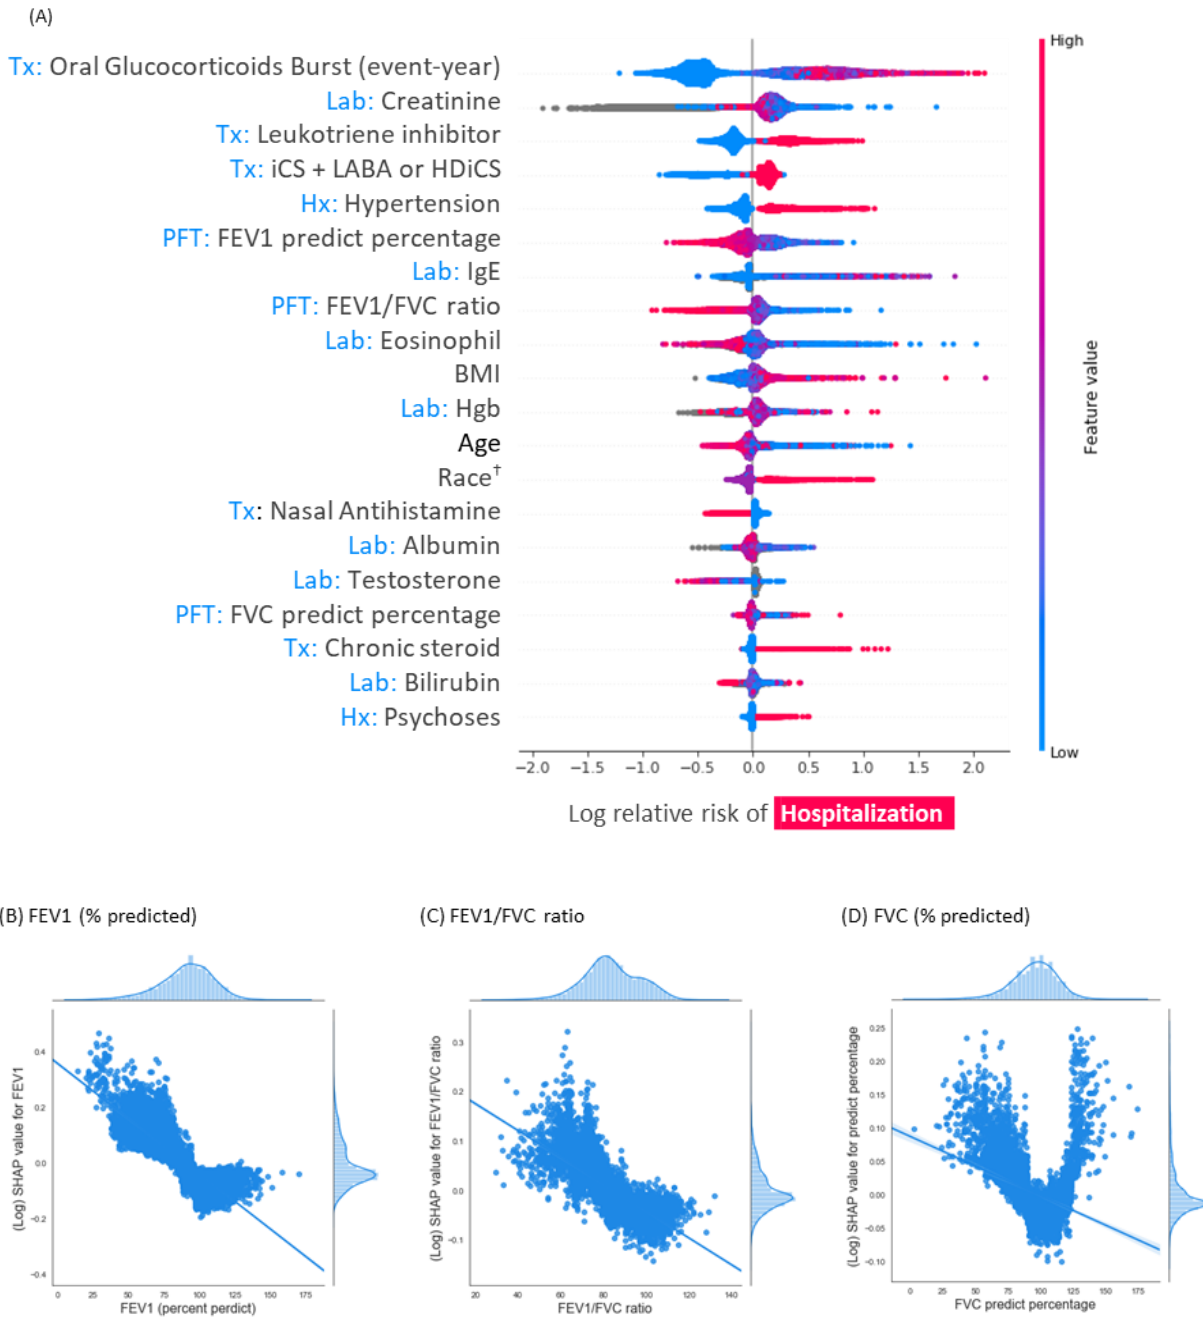

(E) Example of a predicted high-risk patients

**e-Figure 7: Receiver-operating-characteristics – area under the curve (AUC-ROC) of prediction models:**

To handle the missing values in logistic regression and random forest algorithms: we used two strategies: (A) the variables with more than 80% missing values (IgE, progesterone, testosterone, DHEAS, estradiol, and FeNO) were excluded. For the variables with less than 80% missing values (eosinophil, albumin, bilirubin, Hgb, BMI and creatinine), the missing data was imputed with median value. (B) The variables with more than 80% missing values were excluded, then we excluded patients with missing data and yield N= 34,431 patients.

(1) Receiver-operating-characteristics (ROC) curves for non-severe exacerbation prediction model:

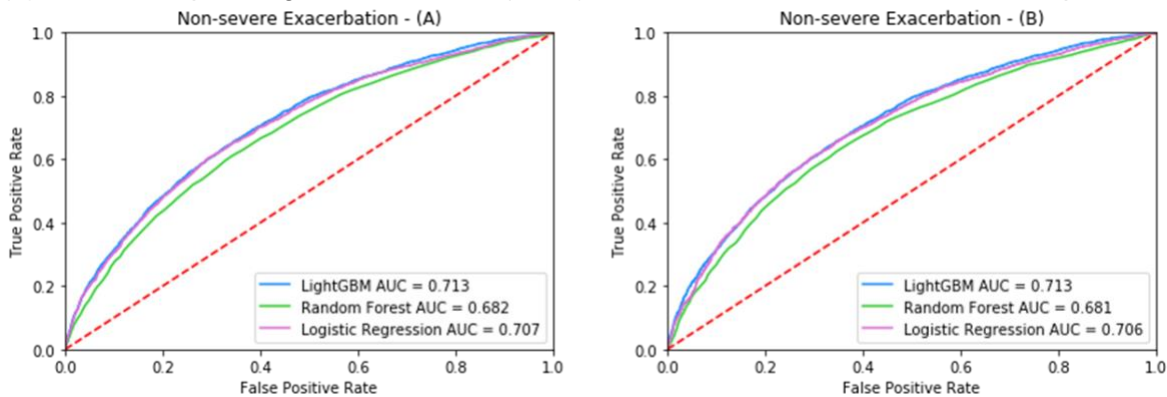

(2) ROC curves for emergency visit prediction models:

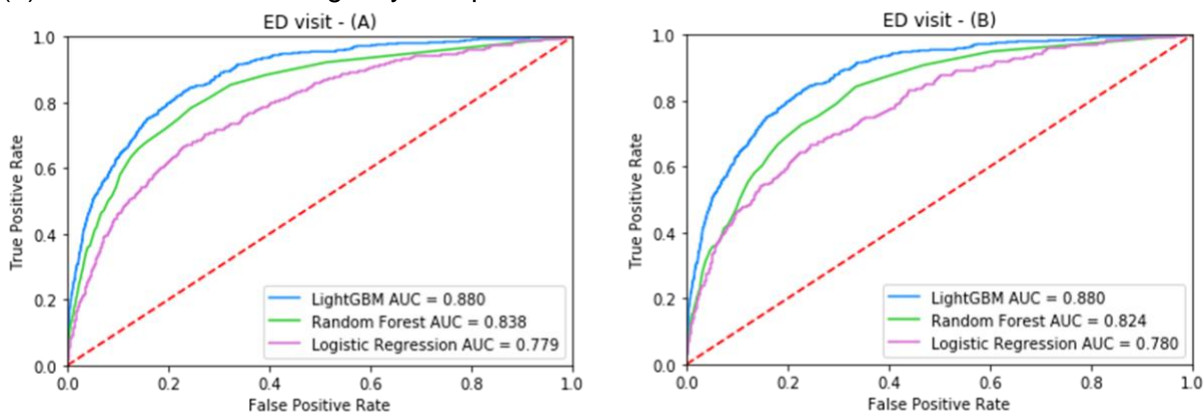

(3) ROC curves for hospitalization prediction models

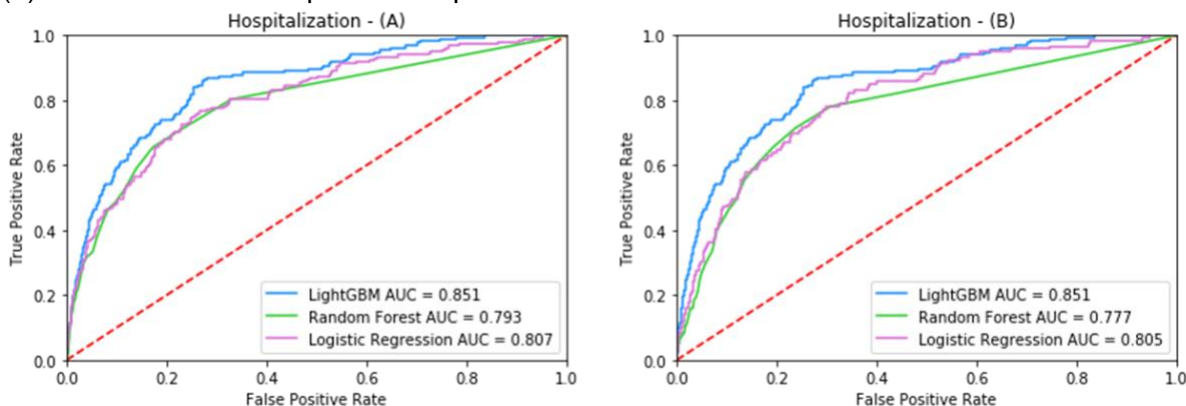



**e-Table 1. List of covariables in prediction models including demographic, comorbidities, lab values and received treatments.**

|                                     |                                                     |
|-------------------------------------|-----------------------------------------------------|
| Age                                 | Hx: Rheumatoid arthritis collagen vascular diseases |
| BMI                                 | Hx: Sinusitis                                       |
| Gender                              | Hx: Sleep Apnea                                     |
| Race                                | Hx: Malignancy without metastasis                   |
| Hispanic                            | Hx: UC                                              |
| Smoking Status                      | Hx: Hypothyroidism                                  |
| Hx: Alcohol abuse                   | Lab: Albumin                                        |
| Hx: AIDS                            | Lab: Bilirubin                                      |
| Hx: Anemia                          | Lab: Creatinine                                     |
| Hx: Blood_Loss                      | Lab: DHEAS                                          |
| Hx: Coagulopathy                    | Lab: Eosinophil                                     |
| Hx: CROHNS_DISEASE                  | Lab: Estradiol                                      |
| Hx: Depression                      | Lab: FeNO                                           |
| Hx: Diabetes                        | Lab: Hgb                                            |
| Hx: Drug Abuse                      | Lab: IgE                                            |
| Hx: Intubation                      | Lab: Progesterone                                   |
| Hx: GERD                            | Lab: Testosterone                                   |
| Hx: Hypertension                    | Tx: Nasal Antihistamines                            |
| Hx: Liver Disease                   | Tx: Oral Glucocorticoids Bursts (frequency) *       |
| Hx: Lymphoma                        | Tx: Anit-IgE                                        |
| Hx: Menopause                       | Tx: Chronic Steroid                                 |
| Hx: Metastatic cancer               | Tx: iCS                                             |
| Hx: Nasal Polyps                    | Tx: iCS + LABA or HDiCS                             |
| Hx: Paralysis                       | Tx: LTRAs                                           |
| Hx: Peptic Ulcer                    | Tx: Nasal Steroids                                  |
| Hx: Peripheral vascular disease     | Tx: SABA                                            |
| Hx: Psychoses                       | Tx: Theophylline                                    |
| Hx: Pulmonary Circulation Disorders |                                                     |
| Hx: Renal Failure                   |                                                     |

\*Oral GLUCOCORTICOID burst is not covariable in non-severe exacerbation prediction model

**e-Table 2.** Brier score of all different models.

|                 | <b>LGBM</b> | <b>Logistic regression</b> | <b>Random Forest</b> |
|-----------------|-------------|----------------------------|----------------------|
| Non-severe      | 0.197       | 0.198                      | 0.208                |
| ED              | 0.031       | 0.0001                     | 0.034                |
| Hospitalization | 0.014       | 0.014                      | 0.015                |

**e-Table 3.** AUC comparison of performance for prediction models with and without PFT data.

| <b>Prediction Models</b>   | <b>AUC:</b>          | <b>AUC:</b>      |
|----------------------------|----------------------|------------------|
|                            | <b>PFTs Included</b> | <b>No PFTs</b>   |
| Non-severe exacerbation    | 0.74 (0.71-0.76)     | 0.71 (0.70-0.72) |
| Emergency department visit | 0.84 (0.81-0.88)     | 0.88 (0.86-0.89) |
| Hospitalization            | 0.86 (0.81-0.9)      | 0.85 (0.82-0.88) |

**e-Table 4:** Performance of original model and validation result of using 2019 dataset

|                 |                        | <b>Non-severe exacerbations</b> | <b>ER visits</b> | <b>Hospitalization</b> |
|-----------------|------------------------|---------------------------------|------------------|------------------------|
| LGBM            | 2019                   | 0.65                            | 0.86             | 0.87                   |
|                 | Original (2010 – 2018) | 0.71                            | 0.88             | 0.85                   |
| RF <sup>a</sup> | 2019                   | 0.64                            | 0.84             | 0.85                   |
|                 | Original (2010 – 2018) | 0.68                            | 0.84             | 0.79                   |
| LR <sup>a</sup> | 2019                   | 0.66                            | 0.83             | 0.89                   |
|                 | Original (2010 – 2018) | 0.71                            | 0.78             | 0.81                   |

**e-Appendix 1.**  
**Cleveland Clinic Health System eResearch Extraction Tool**

**A1.1 – Search Criteria:**

- Female=2; male =1, non-identifiable gender= exclude
- ICD code; x means 0 to 9, xx means 00 to 99, xxx means 000 to 999

**A1.2 – Inclusion Criteria:**

- All patient seen at the Cleveland Health System (CCHS) between 01/01/2010 and 12/31/2018 with either an International Classification of Diseases, 9<sup>th</sup> Revision, Clinical Modification (ICD 9 CM) or an ICD 910 CM code of asthma.
  - Asthma ICD9 CM codes: 493.00, 493.01, 493.02, 493.11, 493.12, 493.20, 493.21, 493.22, 493.81, 493.82, 493.90, 493.91, 493.92
  - Asthma ICD 10 CM codes: J45.20, J45.21, J45.22, J45.30, J45.31, J45.32, J45.40, J45.41, J45.42, J45.50, J45.51, J45.52, J45.901, J45.902, J45.909, J45.990, J45.991, J45.998

**A1.3 – Exclusion Criteria:**

- We excluded pregnant women; and patients who carry, in addition to an asthma ICD code, any additional ICD code for any “other chronic lung disease” as listed in **Table A1.1**.

**A1.4 – Data Elements Collected**

*A1.4.1 – Demographics*

- Age in years
- Gender
- Race and ethnicity
- Age in years at asthma diagnosis

*A1.4.2 – Clinical Characteristics*

- Height (cm)
- Weight (KG)
- Body mass index
- Oxygen saturation (pulse ox)
- Asthma severity defined by ICD-10
- 

*A1.4.3 – Other chronic lung diseases (to be excluded). [Table A1.1]*

- Acute and chronic bronchitis
- Exposures to fumes, exhausts and vapors
- Cystic fibrosis
- Bronchiectasis
- Chronic Obstructive Lung Disease (COPD)
- Scoliosis and kyphoscoliosis

*A1.4.4 – Comorbidities identified by ICD codes. [Table A1.2]*

- Congestive heart failure
- Diabetes
- Neuromuscular disorders
- Other neurological disorders such as stroke
- Peripheral vascular diseases
- Peptic ulcer disease
- Hypothyroidism
- Renal failure
- Acquired Immunodeficiency Syndrome
- Metastatic cancer

- hypertension
- Pulmonary circulation disorders
- Valvular heart disease
- Connective tissue disease
- Coagulopathy
- Weight loss
- Fluid and electrolyte disorders
- Acute blood loss
- Anemia
- Alcohol use
- Drug use
- Non-metastatic solid tumors
- Lymphoma and leukemia
- Gastro-esophageal reflux disease
- Nasal polyps
- Obstructive sleep apnea
- Sinusitis
- Inflammatory bowel disease
- Tobacco use
- psychosis
- Obesity
- Depression

*A1.4.5 – Healthcare utilization.*

- Office visit
- Emergency room visit
- Hospitalization
- 

*A1.4.6 – Other conditions [Table A.3].*

- Pregnancy
- Menopausal status

*A1.4.7 – Lab measures*

- Glucose
- BUN
- Creatinine
- Bilirubin
- Complete blood count
- Immunoglobulin E level
- sex hormone level
- Insulin level

*A1.5.8 – Lung function*

- Forced vital capacity (FVC)
- Forced expiratory volume in 1 sec (FEV1)
- FEV1/FVC ratio

*A1.5.9 – Medications*

- Asthma inhalers
- Short acting beta agonists
- Long acting beta agonists
- Inhaled Corticosteroids
- Oral glucocorticoids
- Leukotriene inhibitors
- Anti IgE antibody (Omalizumab)
- Other asthma biologics (anti IL5)
- Theophylline
- Nasal steroids
- Nasal antihistamines
- Statins
- Birth Control Pills
- hormonal replacement therapy
- Testosterone
- Beta blockers
- Metformin
- Insulin
- Other diabetes medications

**Table A1.1** – ICD codes of all “Other Chronic Lung Disease” conditions.

| Other Chronic Lung Disease                                   | ICD 9  | ICD 10              |
|--------------------------------------------------------------|--------|---------------------|
| Bronchitis not specified as acute or chronic                 | 491    | J42                 |
| Simple chronic bronchitis                                    | 491.0  | J41.0               |
| Mucopurulent chronic bronchitis                              | 491.1  | J41.1, J41.8        |
| Obstructive chronic bronchitis without exacerbation          | 491.20 | J44.9               |
| Obstructive chronic bronchitis with (acute) exacerbation     | 491.21 | J44.1               |
| Obstructive chronic bronchitis with acute bronchitis         | 491.22 | J44.0               |
| Other chronic bronchitis                                     | 491.8  | J41.8               |
| Unspecified chronic bronchitis                               | 491.9  | J42                 |
| Emphysema                                                    | 492    | J43.0, J43.1, J43.2 |
| Emphysematous bleb                                           | 492.0  | J43.9               |
| Other emphysema                                              | 492.8  | J43.8               |
| Chronic respiratory conditions due to fumes and vapors       | 506.4  | J68.4               |
| Bronchiectasis                                               | 494    | J47.0               |
| Bronchiectasis without acute exacerbation                    | 494.0  | J47.9               |
| Bronchiectasis with acute exacerbation                       | 494.1  | J47.1               |
| Chronic airway obstruction, not elsewhere classified         | 496    | J44.9               |
| Respiratory conditions due to fumes and vapors               | 506    | J68.2               |
| Bronchitis and pneumonitis due to fumes and vapor            | 506.0  | J68.0               |
| Acute Pulmonary edema due to fumes and vapors                | 506.1  | J68.1               |
| Upper respiratory Inflammation due to fumes and vapors       | 506.2  | J68.2               |
| Other Acute and Subacute respiratory conditions due to fumes | 506.3  | J68.3, J68.8        |
| Chronic respiratory conditions due to fumes and vapor        | 506.4  | J68.4               |
| Unspecified respiratory conditions due to fumes and vapors   | 506.9  | J68.9               |
| Cystic fibrosis without meconium ileus                       | 277.00 | E84.9               |
| Cystic fibrosis with meconium ileus                          | 277.01 | E84.11              |
| Cystic fibrosis with pulmonary manifestations                | 277.02 | E84.0               |
| Cystic fibrosis with gastrointestinal manifestations         | 277.03 | E84.1, E84.19       |
| Cystic Fibrosis with other manifestations                    | 277.09 | E84.8               |
| Scoliosis (and kyphoscoliosis) idiopathic                    | 737.30 | M41.20              |
| Resolving infantile idiopathic scoliosis                     | 737.31 | M41.00              |
| Progressive infantile idiopathic scoliosis                   | 737.32 | M41.00              |
| Scoliosis due to radiation                                   | 737.33 | M96.5               |
| Thoracogenic scoliosis                                       | 737.34 | M41.30              |
| Other kyphoscoliosis and scoliosis                           | 737.39 | M41.80, M41.9       |

**Table A1.2 – Comorbid conditions: ICD 9 CM and ICD 10 CM codes**

| Comorbidity                                                                                                                     | ICD9                                                                                                                                                      | ICD10                                                                                                                                                                                                                                                                                          |
|---------------------------------------------------------------------------------------------------------------------------------|-----------------------------------------------------------------------------------------------------------------------------------------------------------|------------------------------------------------------------------------------------------------------------------------------------------------------------------------------------------------------------------------------------------------------------------------------------------------|
| Congestive heart failure                                                                                                        | 398.91, 402.01, 402.11, 402.91, 404.01, 404.11, 404.91, 428.0-428.9                                                                                       | I09.81, I11.0, I13.0, I50.x, I50.xx.                                                                                                                                                                                                                                                           |
| Valvular disease                                                                                                                | 093.20-093.24, 394.0-397.1, 424.0-424.91, 746.3-746.6, V42.2, V43.3                                                                                       | A52.03, I05.0 - I05.2, I05.8, I06.0 - I06.2, I06.8, I06.9, I08.0, I08.8, I08.9, I07.1, I07.2, I07.8, I09.89, I34.0, I34.8, I35.0 - I35.2, I35.8, I35.9, I36, I36.8, I37.0, I37.8, I38, I39, Q23.0-Q23.3, Z95.3, Z95.2                                                                          |
| Pulmonary circulation                                                                                                           | 416.0-416.9, 417.9                                                                                                                                        | I27.0, I27.1, I27.82, I27.2, I27.89, I28.9                                                                                                                                                                                                                                                     |
| Peripheral vascular disorders                                                                                                   | 440.0-440.9, 441.00-441.9, 442.0-442.9, 443.1-443.9, 447.1, 557.1, 557.9, V43.4                                                                           | I70.0, I70.1, I70.209, I70.219, I70.229, I70.25, I70.269, I70.299- I70.599, I70.8, I70.90-I70.92, I71.00-I71.03, I71.1- I71.9, I72.0- I72.4, I72.8, I72.9, I73.1, I77.71- I77.74, I77.79, I79.8, I73.81, I73.89, I73.9, I77.1, K55.1, K55.9, Z95.828                                           |
| Hypertension (uncomplicated)                                                                                                    | 401.1, 401.9, 642.00-642.04                                                                                                                               | I10, O10.019, O10.919, O10.011 - O10.013, O10.02, O10.911 - O10.913, O10.92, O10.03, O10.93                                                                                                                                                                                                    |
| Hypertension, (complicated)                                                                                                     | 401.0, 402.00 - 402.90, 403.00 - 403.90, 404.00, 404.10, 404.90, 405.01- 405.99, 642.10 -462.24, 642.70 - 642.94                                          | I11.9, I12.9, I13.10, I15.0, I15.8, O10.419, O10.13, O10.23, O10.33, O11.9, O16.1, O16.2, O16.3                                                                                                                                                                                                |
| Paralysis                                                                                                                       | 342.0-342.12, 342.9-344.9, 438.20-438.53                                                                                                                  | G81.00-G81.04, G81.10-G81.14, G81.90-G81.94, G81.90-G81.94, G80.0-G80.2, G80.8, G80.9, G82.20, G82.50-G82.54, G83.0, G83.10-G83.14, G83.20-G83.24, G83.30, G83.4, G83.5, G83.81-G83.89, G83.9, I69.959, I69.951-I69.954, I69.939, I69.931-I69.934, I69.949, I69.941-I69.944, , I69.961-I69.969 |
| Other neurological disorders                                                                                                    | 330.0 - 331.9, 332.0, 333.4, 333.5, 334.0-335.9, 340, 341.1 - 341.9, 345.00-45.11, 345.2-345.3, 345.40-345.91, 348.1, 348.3-348.39, 780.31, 780.39, 784.3 | E75.0- E75.6, G10, G11.1 – G11.9, G12.0- G12.9, G20, G25.4, G25.5, G30.01- G31.09, G30.9, G31.1, G31.81, G31.82, G31.83, G31.84, G31.85, G31.89, G31.9, G35, G37.0- G37.9, G40.0 – G40.919, G40.A- G40.A19, G40.B – G40.B19, F84.2, G91.0, G91.2, G93.1, G93.9, G94, R56.00, R56.9, R47.01     |
| Chronic pulmonary disease                                                                                                       | 490-492.8, 494-494.1, 495.0-505, 506.4                                                                                                                    | J40, J41.0- J41.8, J42, J43.0 - J43.9, J44.0 - J44.9, J47.1 - J47.9, J60, J61, J62.0, J62.8, J63.0- J63.6, J64, J66.0- J66.8, J67.0 - J67.9, J68.4                                                                                                                                             |
| Diabetes, uncomplicated                                                                                                         | 250.00-250.03                                                                                                                                             | E10.9, E11.9,                                                                                                                                                                                                                                                                                  |
| Diabetes, complicated                                                                                                           | 250.10-250.93                                                                                                                                             | E11.0 - E11.8, E10.0 - E10.8                                                                                                                                                                                                                                                                   |
| Hypothyroidism                                                                                                                  | 243-244.2, 244.8, 244.9                                                                                                                                   | E00.9, E01.8, E03.0, E03.1, E03.2, E03.3, E03.4, E03.5, E03.8, E03.9, E89.0                                                                                                                                                                                                                    |
| Peptic ulcer disease excluding bleeding                                                                                         | 531.41 - 531.91, 532.41 - 532.91, 533 - 533.91, 534.41 - 534.90, V12.71                                                                                   | K25.3, K25.4 - K25.9, K26.3 - K26.9, K27.3 -K27.9, K28.3 - K28.9, Z87.11                                                                                                                                                                                                                       |
| AIDS stands for acute immunodeficiency syndrome; GERD for gastroesophageal reflux disease; PCOS for polycystic ovarian syndrome |                                                                                                                                                           |                                                                                                                                                                                                                                                                                                |

**Table A1.2 – Comorbid conditions: ICD 9 CM and ICD 10 CM codes (continued)**

|                                                                                                                                 |                                                                                                                                                                   |                                                                                                                                                                                                                                                                                                                                                                                                                                                                                                                                                                                                                                                                                                                                                                                                                                                    |
|---------------------------------------------------------------------------------------------------------------------------------|-------------------------------------------------------------------------------------------------------------------------------------------------------------------|----------------------------------------------------------------------------------------------------------------------------------------------------------------------------------------------------------------------------------------------------------------------------------------------------------------------------------------------------------------------------------------------------------------------------------------------------------------------------------------------------------------------------------------------------------------------------------------------------------------------------------------------------------------------------------------------------------------------------------------------------------------------------------------------------------------------------------------------------|
| Renal failure                                                                                                                   | 403.01, 403.11, 403.91, 404.02, 404.03, 404.12, 404.13, 404.92, 404.93, 585.1-585.9, 586, V42.0, V45.11, V45.12, V56.0-V56.2, V56.8                               | I12.0, I13.11, I13.2, N18.1, N18.2, N18.3, N18.4, N18.5, N18.6, N18.9, N19, Z49.01, Z49.02, Z49.31, Z49.32, Z91.15, Z94.0, Z99.2                                                                                                                                                                                                                                                                                                                                                                                                                                                                                                                                                                                                                                                                                                                   |
| Liver disease                                                                                                                   | 070.22, 070.23, 070.32, 070.33, 070.44, 070.54, 456.0, 456.1, 456.20, 456.21, 571.0, 571.2, 571.3, 571.40-571.49, 571.5, 571.6, 571.8, 571.9, 572.3, 572.8, V42.7 | B18.0, B18.1, B18.2, B18.8, B18.9, I85.0, I85.00, I85.01, I85.1, I85.10, I85.11, 45.21, K70.0, K70.1, K70.10, K70.11, K70.2, K70.3, K70.30, K70.31, K70.4 - K70.41, K70.9, K72.0 - K72.9, K72.90, K72.91, K73.0 - K73.9, K74.0 - K74.6, K74.60, K74.69, K75.2 - K75.8, K75.81, K75.89, K75.9, K76.0 - K76.8, K76.81, K76.89, K76.9, Z94.4                                                                                                                                                                                                                                                                                                                                                                                                                                                                                                          |
| AIDS                                                                                                                            | 042-044.9                                                                                                                                                         | B20, B9735, R75, Z21                                                                                                                                                                                                                                                                                                                                                                                                                                                                                                                                                                                                                                                                                                                                                                                                                               |
| Lymphoma                                                                                                                        | 200.00-202.38, 202.50-203.01, 203.8-203.81, 238.6, 273.3, V10.71, V10.72, V10.79                                                                                  | C81.0 - C81.99, C82.0 - C82.99, C83.0 - C83.99, C90.0 - C90.32, D47.Z9, Z85.71, Z85.79,                                                                                                                                                                                                                                                                                                                                                                                                                                                                                                                                                                                                                                                                                                                                                            |
| Metastatic cancer                                                                                                               | 196.0-199.1                                                                                                                                                       | C77.0 - C77.9, C78.0 - C78.89, C79.0 - C79.9, C80.0, C80.1, C80.2                                                                                                                                                                                                                                                                                                                                                                                                                                                                                                                                                                                                                                                                                                                                                                                  |
| Solid tumor without metastasis                                                                                                  | 140.0-172.9, 174.0-175.9, 179-195.8, V10.00-V10.59, V10.81- V10.9                                                                                                 | C00.0 - C00.8, C01, C02, C02.1 - C02.9, C03.0, C03.1, C03.9, C04.0 - C04.9, C05.0 - C05.9, C06.0 - C06.9, C07, C08, C08.9, C09.0 - C09.9, C10.0 - C10.9, C11.0 - C11.9, C13.0 - C13.9, C14.0 - C14.8, C15.3 - C15.9, C16.0 - C16.9, C17.0 - C17.9, C18.0 - C18.9, C19, C20, C21.0 - C21.8, C22.0 - C22.9, C23, C24.0 - C24.9, C25.0 - C25.9, C26.0 - C26.9, C30.0 - C30.9, C31.0 - C31.9, C32.0 - C32.9, C33, C34.00 - C34.90, C37, C38.0 - C38.8, C39.0 - C39.9, C41.0 - C41.9, C43.0 - C43.9, C48.0 - C48.2, C49.0 - C49.9, C50.019 - C50.929, C51.0 - C51.9, C52, C53.0 - C53.9, C54.1- C54.9, C55, C56.0 - C56.9, C57.00- C57.9, C58, C60.0 - C60.9, C61, C62.00 - C62.90, C63.0- C63.9, C64.1 - C64.9, C67.0 - C67.9, C69.10 - C69.90, C71.0 - C71.9, C72.0 - C72.9, C73, C75.0 - C75.9, C76.1 - C76.9, Z85.0 - Z85.9 (Except Z85.71, Z85.79) |
| Rheumatoid arthritis/collagen vascular diseases                                                                                 | 701.0, 710.0-710.9, 714.0-714.9, 720.0-720.9, 725                                                                                                                 | L90.0, L94.0 - L94.9, M05.0 - M05.9, M06.0 - M06.9, M08.0 - M08.9, M12.0 - M12.9, M32.0, M32.1, M32.10 - M32.19, M32.8, M32.9, M33.0- M33.09, M33.1, M33.10 - M33.19, M33.2, M33.20 - M33.29, M33.9, M33.90 -M33.99, M34.0 - M34.8, M34.81-M34.89, M34.9, M35.00 - M35.09, M35.1 - M35.9, M45.0 - M45.9, M46.0 - M46.9                                                                                                                                                                                                                                                                                                                                                                                                                                                                                                                             |
| AIDS stands for acute immunodeficiency syndrome; GERD for gastroesophageal reflux disease; PCOS for polycystic ovarian syndrome |                                                                                                                                                                   |                                                                                                                                                                                                                                                                                                                                                                                                                                                                                                                                                                                                                                                                                                                                                                                                                                                    |

**Table A1.2 – Comorbid conditions: ICD 9 CM and ICD 10 CM codes (continued)**

|                                 |                                                              |                                                                                                                                                                 |
|---------------------------------|--------------------------------------------------------------|-----------------------------------------------------------------------------------------------------------------------------------------------------------------|
| Coagulopathy                    | 286.0-286.9, 287.1-287.5, 289.81                             | D65, D66, D67, D68.0, D68.1 - D68.9, D69.1 - D69.9                                                                                                              |
| Weight loss                     | 260-263.9                                                    | E40, E41, E42, E43, E44.0, E44.1, E45, E46,                                                                                                                     |
| Fluid and electrolyte disorders | 276.0-276.9                                                  | E86.0, E86.1, E86.9, E87.0 - E87.7, E87.70, E87.71, E87.79, E87.8                                                                                               |
| Blood loss anemia               | 2800, 648.20-648.24                                          | D50.0, O99.011, O99.012, O99.013, O99.02, O99.019, O99.03, O90.81                                                                                               |
| Deficiency anemias              | 280.1-281.9, 285.2-285.29, 285.9                             | D50.8, D50.1 - D50.9, D51.0 - D51.9, D52.0 - D52.9, D53.0 - D53.9, D63.0 - D63.8, D64.0-D64.9                                                                   |
| Alcohol abuse                   | 291.0-291.9, 303.00- 303.93, 305.00-305.03, V113             | F10.1, F10.10 - F10.29, F10.920, F10.921, F10.929, F10.94, F10.95, F10.950, F10.951, F10.959, F10.96, F10.97, F10.98, F10.980 - F10.982, F10.988, F10.99, Z65.8 |
| Drug abuse                      | 292.0 - 292.9, 304.00-304.93, 305.20-305.93, 648.30 - 648.34 | F11.1 - F11.9, F12.1 - F12.9, F13.1 - F13.9, F14.1- F14.9, F15.1 - F15.9, F16.1 - F16.9, F18.1 -F18.9, F19.x - F19.9, O99.320 - O99.325,                        |
| Psychoses                       | 295.00-298.9, 299.10, 299.11                                 | F20.0 - F20.9, F22, F23, F24, F25.0 - F25.9, F28, F29, F30.1- F30.9, F44.0- F44.9, F84.3                                                                        |
| Depression                      | 300.4, 301.12, 309.0, 309.1, 311                             | F34.1, F43.21, F32.9, F33.0 - F33.9, 9                                                                                                                          |
| Obesity                         | 278.00 - 278.03, 649.10 - 649.13,                            | E66.9, E66.01, E66.2, O99.210 -O99.215, Z13.89                                                                                                                  |
| Sinusitis                       | 461.0 - 461.9, 473.0-473.9                                   | J01.00 - J01.90, J32.0 - J32.9                                                                                                                                  |
| Rhinitis                        | 472.0 - 477.9                                                | J31.0 - J30.9                                                                                                                                                   |
| Nasal polyps                    | 471.0, 471.8, 471.9                                          | J33.0, J33.8, J33.9                                                                                                                                             |
| GERD                            | 530.11, 530.81                                               | K21.0, K21.9                                                                                                                                                    |
| Sleep apnea                     | 780.57, 786.03, 327.23                                       | G47.30, R06.81, G4.33                                                                                                                                           |
| PCOD                            | 256.4                                                        | E28.2                                                                                                                                                           |
| Crohn's disease                 | 555.0- 555.9                                                 | K50.0 – K50.919                                                                                                                                                 |
| Ulcerative Colitis              | 556.0 - 556.9                                                | K51.0 – K51.919                                                                                                                                                 |



**Table A1.3 – Other conditions: ICD 9 CM and ICD 10 CM codes for Pregnancy and Menopause**

|                                | ICD9:                                                                                                                                                                                       | ICD 10                                                                                                                                                                                                                                                                                                                                                                                                                                                                                                                                                                                                                                                                                                                                                                                                                                                                                                                                                                                                                                                                                                                                                                                                     |
|--------------------------------|---------------------------------------------------------------------------------------------------------------------------------------------------------------------------------------------|------------------------------------------------------------------------------------------------------------------------------------------------------------------------------------------------------------------------------------------------------------------------------------------------------------------------------------------------------------------------------------------------------------------------------------------------------------------------------------------------------------------------------------------------------------------------------------------------------------------------------------------------------------------------------------------------------------------------------------------------------------------------------------------------------------------------------------------------------------------------------------------------------------------------------------------------------------------------------------------------------------------------------------------------------------------------------------------------------------------------------------------------------------------------------------------------------------|
| Menopause                      | 256.31; 627.0 - 627.9                                                                                                                                                                       | E2.831.0, E2.831.9, E2.839, N92.4, N95.0-N95.9, Z79.890                                                                                                                                                                                                                                                                                                                                                                                                                                                                                                                                                                                                                                                                                                                                                                                                                                                                                                                                                                                                                                                                                                                                                    |
| Pregnancy without complication | 633.01, V61.6, V61.7, V72.42                                                                                                                                                                | O30.x, O30.xx, O30.xxx, Z32.01, Z33.x, Z34.x, Z34.xx, Z39.x,                                                                                                                                                                                                                                                                                                                                                                                                                                                                                                                                                                                                                                                                                                                                                                                                                                                                                                                                                                                                                                                                                                                                               |
| Pregnancy with complications   | 633.10 - 633.91, 640.80 - 640.93, 643.20 - 643.93, 645.xx - 649.xx, 651.xx, 653.xx to 656.xx, 659.40, 659.41, 659.43, 664.xx to 665.xx, 671.xx, 674.00, 674.20, 677, 760.xx - 761.xx, 779.6 | O00.x, O0.x, O0.xx, O0.xxx, O0.xxxx, O01.x, O02.x, O02.xx, O03.x, O03.xx, O04.x, O04.xx, O07.xx, Z3.32, O08.x, O08.xx, O09.x, O09.xx, O09.xxx, O12.x, O12.xx, O21.x, O22.xx, O23.x, O23.xx, O23.xxx, O25.x, O25.xx, O26.x, O26.xx, O26.xxx, O28.x, O29.x, O29.xx, O29.xxx, O31.x, O31.xx, O31.xxx, O34.x, O34.xx, O34.xxx, O35.x, O35.xx, O35.xxx, O36.x, O36.xx, O36.xxx, O43.x, O43.xx, O43.xxx, O88.x, O88.xx, O88.xxx, O91.x, O91.xx, O91.xxx, O92.x, O92.xx, O92.xxx, O98.x, O98.xx, O98.xxx, O99.x, O99.xx, O99.xxx, O9A.x, O9A.xx, O9A.xxx, Z37.x, Z37.xx, Z3A.49, O20.x, O44.x, O44.xx, O45.x, O45.xx, O45.xxx, O46.x, O46.xx, O46.xxx, O10.x, O10.xx, O10.xxx, O11.x, O13.x, O14.x, O14.xx, O15.x, O15.xx, O16.x, O47.x, O47.xx, O60.x, O60.xx, O48.x, O24.x, O24.xx, O24.xxx, O99.x, O99.xx, O99.xxx, A34, O25.x, O25.xx, O26.x, O26.xx, O26.xxx, O35.x, O35.4xxx, O35.6xxx, O35.7xxx, O35.8xxx, O36.4xxx, O61.x, O71.x, O71.xx, O72.x, O73.x, O74.x, O75.x, O75.xx, O76, O77.0, O82, O85, O86.x, O86.xx, O87.x, O88.x, O88.xx, O88.xxx, O89.x, O89.xx, O90.x, O90.xx, O91.x, O91.xx, O91.xxx, O92.x, O92.xx, O92.xxx, O94, O98.x, O98.xx, O99.x, O99.xx, O99.xxx, O9A.x, O9A.xx, O9A.xxx, Z37.0 |
